# Supplementary material for: How to Model an Intermittent Water Supply: Comparing Modeling Choices and Their Impact on Inequality
Source: Atypon-hosted journal article supplement (doi:10.1061/jwrmd5.wreng-6090), 2023-10-18
Supplement: supplemental materials_jwrmd5.wreng-6090_abdelazeem.pdf [file supplemental%20materials_jwrmd5.wreng-6090_abdelazeem.pdf]

## SUPPLEMENTAL MATERIALS

*ASCE Journal of Water Resources Planning and Management*

# How to Model an Intermittent Water Supply: Comparing Modeling Choices and Their Impact on Inequality

Omar Abdelazeem and David D. J. Meyer

**DOI:** 10.1061/JWRMD5.WRENG-6090

© ASCE 2023

[www.ascelibrary.org](http://www.ascelibrary.org)

## Supplemental Text

*Text S1: Extended methods for modelling pressure dependence in EPANET* ..... 2

### List of Equations

|                                                                                                     |   |
|-----------------------------------------------------------------------------------------------------|---|
| Eq. S1. Flow through an emitter in EPANET.....                                                      | 2 |
| Eq. S2. Emitter coefficient for head-flow relationship in FCV-EM .....                              | 2 |
| Eq. S3. Minor Headloss Equation in EPANET .....                                                     | 2 |
| Eq. S4. Minor Loss coefficient to match the head-flow relationship in FCV-Res and PSV-Tank.....     | 2 |
| Eq. S5. Pipe length to match major losses to the head-flow relationship in CV-Tank and CV-Res ..... | 3 |
| Eq. S6. Tank Diameter for CV-Tank and PSV-tank.....                                                 | 3 |

### Supplemental Tables

|                                                                                                                                       |   |
|---------------------------------------------------------------------------------------------------------------------------------------|---|
| Table S1. Classification of 30 studies that proposed or employed hydraulic modelling methods for IWS networks.....                    | 4 |
| Table S2. Description of Compared Pressurized IWS (EPANET) methods .....                                                              | 6 |
| Table S3. Detailed implementation of flow-restricted and unrestricted methods as used in this study.....                              | 7 |
| Table S4. Detailed implementation of volume-restricted methods as used in this study .....                                            | 7 |
| Table S5. Execution time IWS simulations using all 6 EPANET-based methods in milliseconds per run (Average of 1,000 timed runs) ..... | 8 |

### Supplemental Figures

|                                                                                                                                                                                                           |    |
|-----------------------------------------------------------------------------------------------------------------------------------------------------------------------------------------------------------|----|
| Fig. S1. Network 1 Layout (Campisano et al. 2019b) .....                                                                                                                                                  | 9  |
| Fig. S2. Network 2 Layout (Bragalli et al. 2012) .....                                                                                                                                                    | 9  |
| Fig. S3. Network 3 Layout (Bragalli et al. 2012) .....                                                                                                                                                    | 10 |
| Fig. S4. The mean demand Satisfaction Ratio (delivered/desired volume) in Network 2 during a supply of a) 4 hours/day and b) 12 hours/day. Corresponding figure: Fig. 2.....                              | 11 |
| Fig. S5. The mean demand Satisfaction Ratio (delivered/desired volume) in Network 3 during a supply of a) 4 hours/day and b) 12 hours/day. Corresponding figure: Fig. 2.....                              | 11 |
| Fig. S6. Mean Nodal Pressure (Solid) and its 10 <sup>th</sup> to 90 <sup>th</sup> Percentile range (Shaded) for an unrestricted, a volume-restricted and a flow-restricted method.....                    | 12 |
| Fig. S7. Mean satisfaction ratio (Solid line) and satisfaction ratio ranging from the 10 <sup>th</sup> to 90 <sup>th</sup> percentile consumers (shaded) in Network 1. Corresponding figure: Fig. 3 ..... | 12 |
| Fig. S8. Mean satisfaction ratio (Solid line) and satisfaction ratio ranging from the 10 <sup>th</sup> to 90 <sup>th</sup> percentile consumers (shaded) in Network 2. Corresponding figure: Fig. 3 ..... | 13 |
| Fig. S9. Predicted mean satisfaction ratio and its range (10 <sup>th</sup> -90 <sup>th</sup> ) in Network 1 Filling vs. Non-Filling Corresponding figure: Fig. 5 .....                                    | 14 |
| Fig. S10. Predicted mean satisfaction ratio and its range (10 <sup>th</sup> -90 <sup>th</sup> ) in Network 2 Filling vs. Non-Filling. Corresponding figure: Fig. 5 .....                                  | 15 |

## Text S1. Extended methods for modelling pressure dependence in EPANET

The pressure dependence of demand in many IWS modelling methods is enforced with artificial elements. A given method may use an emitter, a minor loss or a major loss (e.g., via pipe length or diameter) to achieve the desired flow resistance.

### Emitter sizing

Flow through an emitter in EPANET flows according to:

*Eq. S1. Flow through an emitter in EPANET*

$$Q = C_E H^\alpha$$

Where  $Q$  is the flow out of the emitter (to the consumer),  $C_E$  is the emitter's coefficient and  $\alpha$  is the emitter's exponent. We assumed, following (Abdy Sayyed et al. 2015) that  $\alpha = 0.5$ .

*Eq. S2. Emitter coefficient for head-flow relationship in FCV-EM*

$$C_E = \frac{Q_{des}}{(H_{des} - H_{min})^\alpha}$$

### Minor loss sizing

The minor (local) head losses in EPANET behave according to:

*Eq. S3. Minor Headloss Equation in EPANET*

$$h_{minor} = K_{minor} \frac{8Q^2}{g\pi^2 D^4}$$

Where  $h_{minor}$  is the minor head loss and  $K_{minor}$  is the minor loss coefficient. Accordingly, we can mimic the desired head-flow relationship by selecting:

*Eq. S4. Minor Loss coefficient to match the head-flow relationship in FCV-Res and PSV-Tank*

$$K_{minor} = (H_{des} - H_{min}) \frac{g\pi^2 D^4}{8Q_{des}^2}$$

Where  $K_{minor}$  is the pipe's minor loss coefficient,  $D$  is the artificial pipe's diameter (selected arbitrarily as 350 mm, following Sivakumar et al. (2020), and  $Q_{des}$  is the consumer's desired flow rate. Only one pipe of the artificial element arrangement is assigned a minor loss coefficient. (Gorev and Kodzhesspirova 2013)

### Length sizing

The Hazen-Williams equation can be rearranged to solve for the desired major loss associated with the pipe's length (or diameter). We implemented length-based major losses according to:

*Eq. S5. Pipe length to match major losses to the head-flow relationship in CV-Tank and CV-Res*

$$L = (H_{\text{des}} - H_{\text{min}}) \frac{C^{1.852} D^{4.87}}{10.67 Q_{\text{des}}^{1.852}}$$

Where L is the artificial pipe's length, C is the Hazen-Williams Coefficient (Selected as 130 in this paper), and D is the artificial pipe's diameter (selected as 350 mm for all consumers).

### **Tank Sizing**

In addition to pressure dependent flows achieved with the above loss elements, volume limited methods employed a tank with diameter:

*Eq. S6. Tank Diameter for CV-Tank and PSV-tank*

$$D_{\text{tank}} = \sqrt{\frac{4V_{\text{des}}}{\pi h_{\text{tank}}}}$$

Where  $D_{\text{tank}}$  is the tank's diameter, and  $h_{\text{tank}}$  is the tank's maximum useable height (set at 1 metre in this paper).

Table S1. Classification of 30 studies that proposed or employed hydraulic modelling methods for IWS networks

| Platform | Consumer Withdrawal Model | Study                                                                                                                                                                                                                                         | IWS Phases Modelled |             |          | Notes |
|----------|---------------------------|-----------------------------------------------------------------------------------------------------------------------------------------------------------------------------------------------------------------------------------------------|---------------------|-------------|----------|-------|
|          |                           |                                                                                                                                                                                                                                               | Filling             | Pressurized | Draining |       |
| EPANET   | Unrestricted              | (Batish 2003)<br>(Ang and Jowitt 2006)<br>(Mohapatra et al. 2014)                                                                                                                                                                             |                     | ✓           |          |       |
|          | Volume-Restricted         | (Batterman and Macke 2001)<br>(Ingeduld et al. 2006)<br>(Fontanazza et al. 2007)<br>(Cabrera-Bejar and Tzatchkov 2009)<br>(Ameyaw et al. 2013)<br>(Taylor et al. 2019)<br>(Sivakumar et al. 2020)                                             |                     | ✓           |          |       |
|          | Flow-Restricted           | (Jinesh Babu and Mohan 2012)<br>(Siew and Tanyimboh 2012)<br>(Gorev and Kodzhespirova 2013)<br>(Sivakumar and Prasad 2014, 2015)<br>(Abdy Sayyed et al. 2015)<br>(Mahmoud et al. 2017)<br>(Paez et al. 2018)<br>(Neelakantan and Rohini 2021) |                     | ✓           |          | 1     |
|          | Flow- & Volume-Restricted | (Suribabu et al. 2022)                                                                                                                                                                                                                        |                     | ✓           |          |       |
| EPA-SWMM | Volume-Restricted         | (Segura 2006)<br>(Cabrera-Bejar and Tzatchkov 2009)<br>(Shrestha and Buchberger 2012)                                                                                                                                                         | ✓                   | ✓           |          |       |
|          |                           | (Campisano et al. 2019a)<br>(Gullotta et al. 2021)                                                                                                                                                                                            | ✓                   | ✓           | ✓        |       |

|          |                   |                                                               |   |   |   |      |
|----------|-------------------|---------------------------------------------------------------|---|---|---|------|
| EPA-SWMM | Flow-Restricted   | (Kabaasha 2012)<br>(Dubasik 2017)<br>(Campisano et al. 2019b) | ✓ | ✓ |   |      |
| Custom   | Volume-Restricted | (De Marchis et al. 2010)                                      | ✓ | ✓ |   | 2    |
|          |                   | (Mohan and Abhijith 2020)                                     | ✓ | ✓ | ✓ | 2, 3 |
|          | None              | (Lieb et al. 2016)                                            | ✓ |   |   | 2    |

1 Proposed for Pressure-Deficient Continuous Water Supply networks but has been repurposed for IWS

2 Source code not available

3 Issues with mass conservation

Table S2. Description of Compared Pressurized IWS (EPANET) methods

| Consumer Withdrawal Model | Method     | Based on                                           | Artificial Elements                                                                                               | Pressure-dependence                                                                                                          |
|---------------------------|------------|----------------------------------------------------|-------------------------------------------------------------------------------------------------------------------|------------------------------------------------------------------------------------------------------------------------------|
| Flow-Restricted           | EPANET-PDA | Native to EPANET                                   | None                                                                                                              | - $H_{min}$ , $H_{des}$ and $1/n$ input natively                                                                             |
|                           | FCV-Res    | (Gorev and Kodzhespirova 2013)                     | -Flow Control Valve (FCV)<br>-Artificial Reservoir                                                                | -Reservoir raised by $H_{min}$<br>-FCV set to $Q_{des}$<br>- $H_{des}$ and $n$ set in Local Loss Coefficient                 |
|                           | FCV-EM     | (Abdy Sayyed et al. 2015)                          | -Flow Control Valve (FCV)<br>-Node with Emitter                                                                   | -Emitter raised by $H_{min}$<br>-FCV set to $Q_{des}$<br>-emitter exponent = $1/n$<br>- $H_{des}$ set in emitter coefficient |
| Volume-Restricted         | CV-Tank    | (Batterman and Macke 2001)<br>(Taylor et al. 2019) | -Pipe with Check Valve (CV)<br>-Tank of Volume $V_{des}$                                                          | -Tank raised by $H_{min}$<br>-Distributed Losses adjusted to simulate $H_{des}$ , $Q_{des}$ and $n$                          |
|                           | PSV-Tank   | (Sivakumar et al. 2020)                            | -Pressures-Sustaining Valve (PSV)<br>-2 Connecting Nodes (Dummy)<br>-2 Pipes with CV<br>-Tank of Volume $V_{des}$ | -PSV set to $H_{min}$<br>- $H_{des}$ , $Q_{des}$ and $n$ set in Local Loss Coefficient                                       |
| Unrestricted              | CV-Res     | (Mohapatra et al. 2014)                            | -Pipe with CV<br>-Artificial Reservoir                                                                            | -Reservoir raised by $H_{min}$<br>-Distributed Losses adjusted to simulate $H_{des}$ , $Q_{des}$ and $n$                     |

Detailed notes on how to size components for a given pressure-dependence, see section Text S1.

Table S3. Detailed implementation of flow-restricted and unrestricted methods as used in this study

| Method     | Artificial Pipe |        |           |                    |        | Artificial Node   | Artificial Valve |                  | Artificial Reservoir               | Emitter                            |             |
|------------|-----------------|--------|-----------|--------------------|--------|-------------------|------------------|------------------|------------------------------------|------------------------------------|-------------|
|            | D (mm)          | L (m)  | HW Coeff. | $K_{\text{minor}}$ | Status | Elevation         | Type             | Setting          | Elevation                          | Elevation                          | Coefficient |
| EPANET-PDA | -               | -      | -         | -                  | -      | -                 | -                | -                | -                                  | -                                  | -           |
| FCV-Res    | 350             | 0.1    | 130       | Eq. S4             | CV     | $z_{\text{orig}}$ | FCV              | $Q_{\text{des}}$ | $z_{\text{orig}} + H_{\text{min}}$ | -                                  | -           |
| FCV-EM     | 350             | 0.1    | 130       | 0                  | CV     | $z_{\text{orig}}$ | FCV              | $Q_{\text{des}}$ | -                                  | $z_{\text{orig}} + H_{\text{min}}$ | Eq. S2      |
| CV-Res     | 50              | Eq. S5 | 130       | 0                  | CV     | $z_{\text{orig}}$ | -                | -                | $z_{\text{orig}} + H_{\text{min}}$ |                                    |             |

Where  $z_{\text{orig}}$  is the elevation of the original demand node and all else defined as before.

Table S4. Detailed implementation of volume-restricted methods as used in this study

| Method                | Artificial Pipe(s) |        |           |                    |        | Artificial Node(s) | Artificial Valve |                  | Artificial Tank                    |          |            |
|-----------------------|--------------------|--------|-----------|--------------------|--------|--------------------|------------------|------------------|------------------------------------|----------|------------|
|                       | D (mm)             | L (m)  | HW Coeff. | $K_{\text{minor}}$ | Status | Elevation          | Type             | Setting          | Elevation                          | Diameter | Height (m) |
| CV-Tank               | 50                 | Eq. S5 | 130       | 0                  | CV     | -                  | -                | -                | $z_{\text{orig}} + H_{\text{min}}$ | Eq. S6   | 1          |
| PSV-Tank <sup>1</sup> | 350                | 0.1    | 130       | Eq. S4 & 0         | CV     | $z_{\text{orig}}$  | PSV              | $H_{\text{min}}$ | $z_{\text{orig}} - 1$              | Eq. S6   | 1          |

<sup>1</sup> Where the two pipes differed, values are ordered upstream to downstream. One value means the same in both pipes.



*Table S5. Execution time of IWS simulations using all 6 EPANET-based methods in milliseconds per run (Average of 1,000 timed runs). The similarity of run times between 4-hr and 12-hr simulations in some scenarios likely indicates the solvers use of more iterations to resolve the increased prevalence of pressure-dependent behaviour in the shorter, lower pressure simulations.*

| Network | Supply Duration (hr) | Flow-Restricted |         |            | Volume-Restricted |          | Unrestricted |
|---------|----------------------|-----------------|---------|------------|-------------------|----------|--------------|
|         |                      | FCV-EM          | FCV-Res | EPANET-PDA | CV-Tank           | PSV-Tank | CV-Res       |
| 1       | 4                    | 4.18            | 3.91    | 2          | 3.29              | 5.44     | 2.76         |
|         | 12                   | 4.33            | 3.9     | 1.99       | 3.43              | 5.41     | 2.77         |
| 2       | 4                    | 6.75            | 6.13    | 2.62       | 4.98              | 8.58     | 4.05         |
|         | 12                   | 6.44            | 6.13    | 2.67       | 4.99              | 8.54     | 4.1          |
| 3       | 4                    | 23.69           | 21.69   | 8.8        | 17.61             | 31.84    | 13.82        |
|         | 12                   | 24.46           | 22.33   | 8.79       | 17.19             | 32.81    | 13.84        |

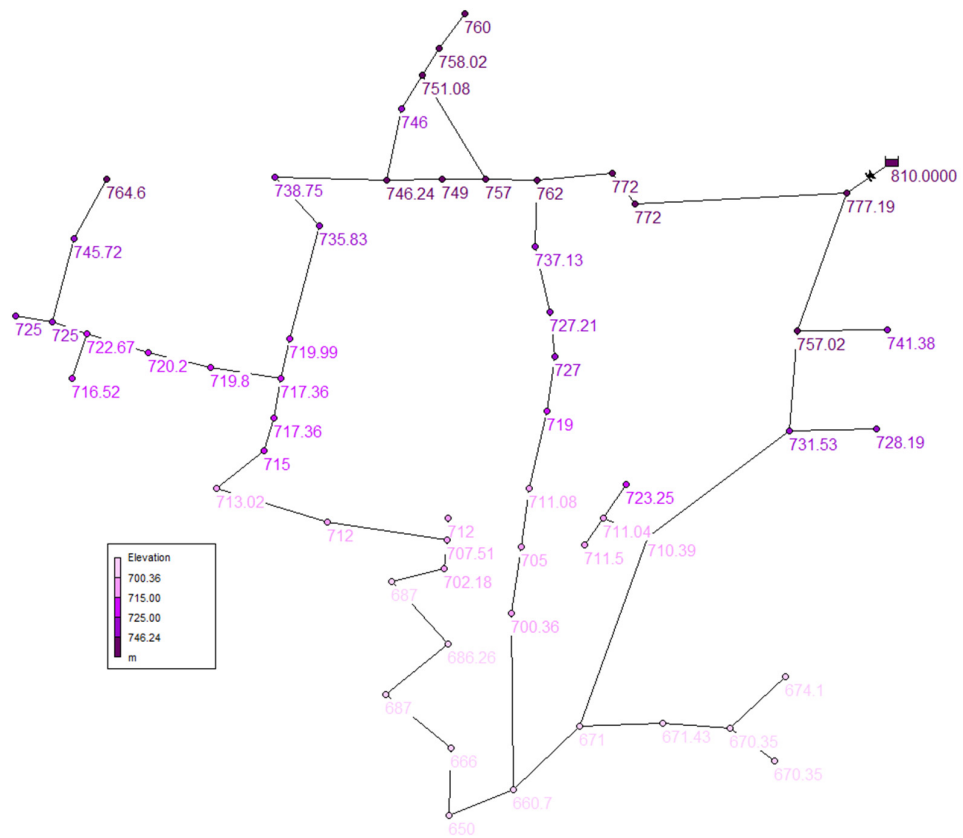

Fig. S1. Network 1 Layout and elevations as proposed by (Campisano et al. 2019b).

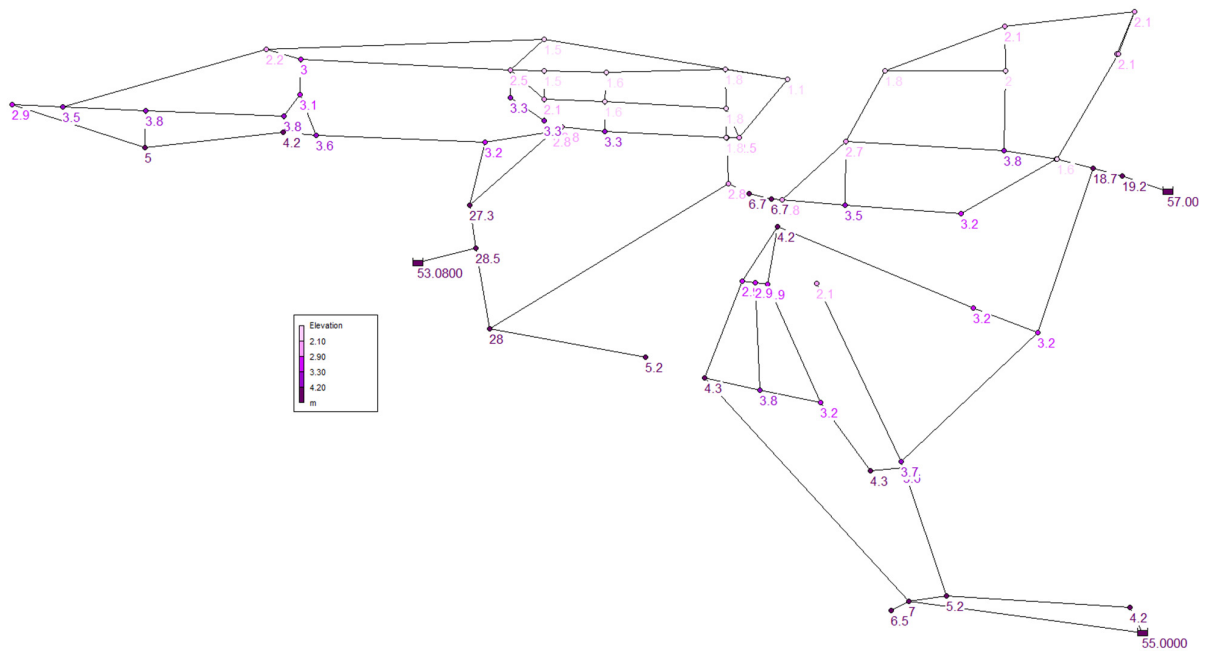

Fig. S2. Network 2 Layout and elevations as proposed by (Bragalli et al. 2012).

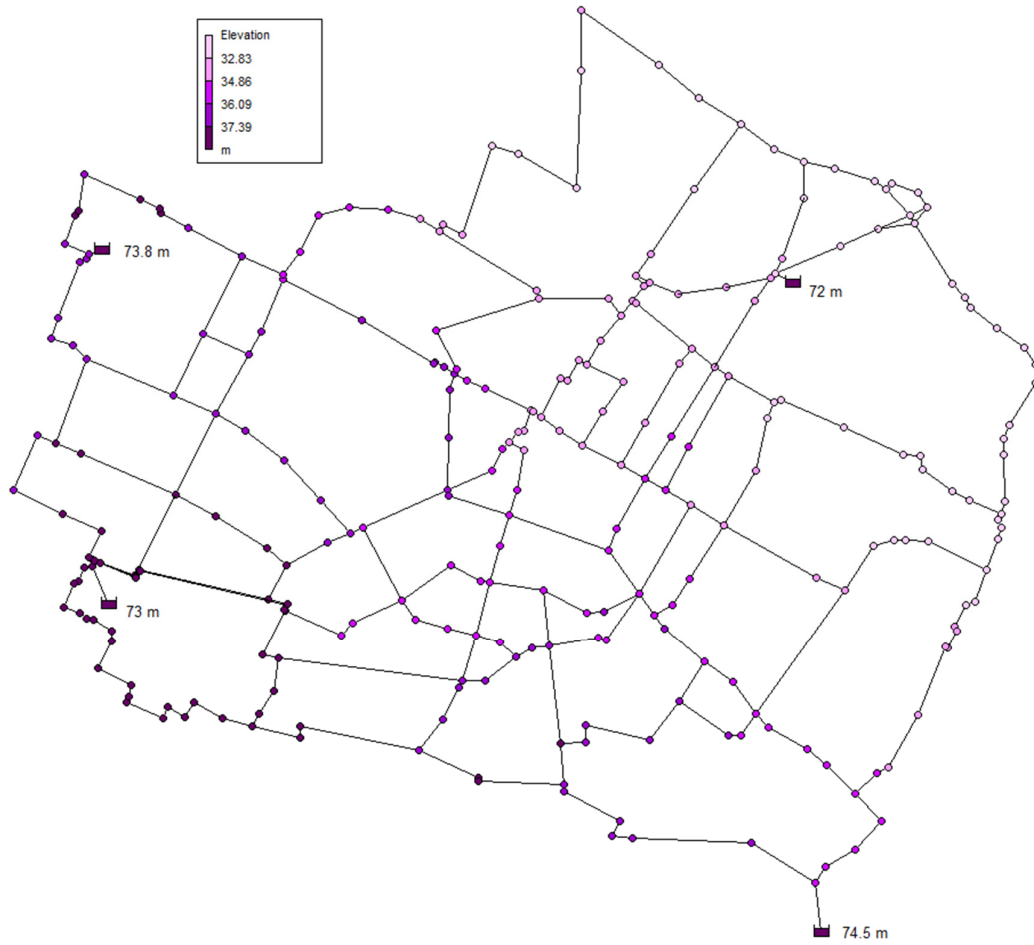

*Fig. S3. Network 3 Layout and elevations as proposed by (Bragalli et al. 2012).*

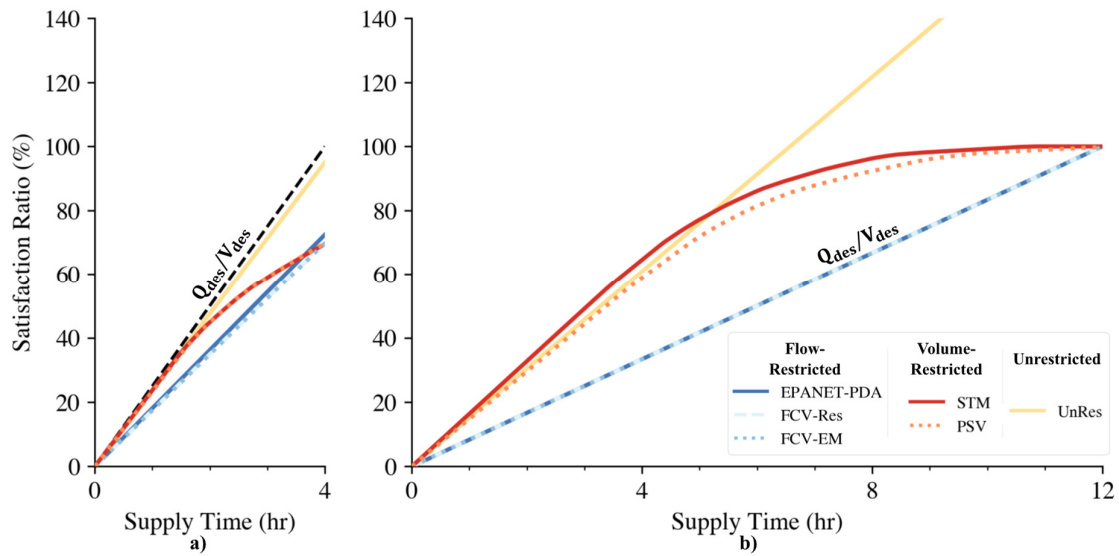

Fig. S4. The mean demand Satisfaction Ratio (delivered/desired volume) in Network 1 during a supply of a) 4 hours/day and b) 12 hours/day when consumers are modelled using flow-restricted methods: EPANET's PDA (Blue), FCV-Res (Dashed Light Blue), and FCV-EM (Dotted Light Blue), volume-restricted methods: Simple Tank (Red) and PSV (Dotted Orange), and unrestricted methods: such as Res (Yellow). Corresponding figure: Fig. 1.

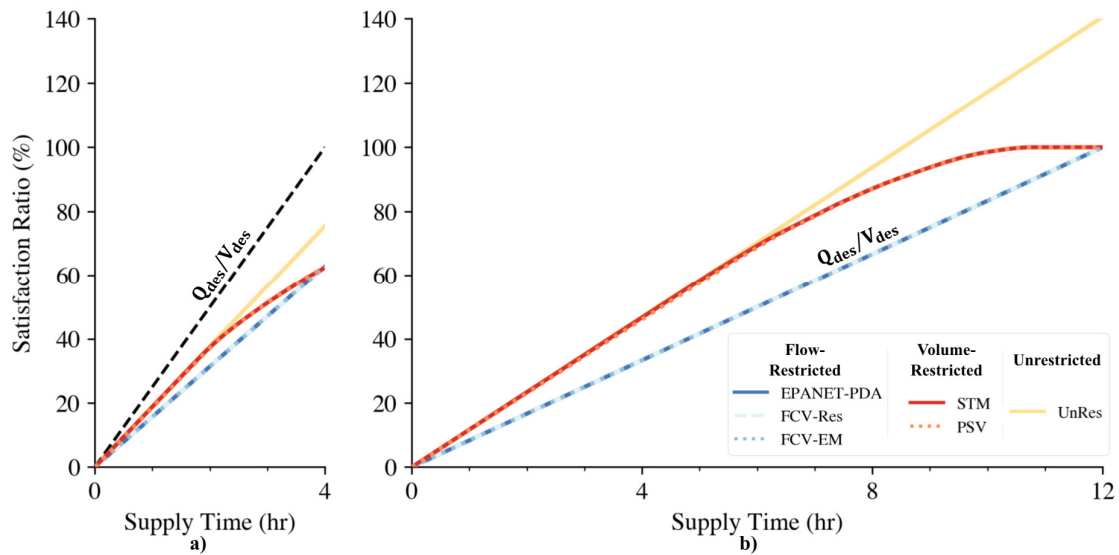

Fig. S5. The mean demand Satisfaction Ratio (delivered/desired volume) in Network 2 during a supply of a) 4 hours/day and b) 12 hours/day when consumers are modelled using flow-restricted methods: EPANET's PDA (Blue), FCV-Res (Dashed Light Blue), and FCV-EM (Dotted Light Blue), volume-restricted methods: Simple Tank (Red) and PSV (Dotted Orange), and unrestricted methods: such as Res (Yellow). Corresponding figure: Fig. 1.

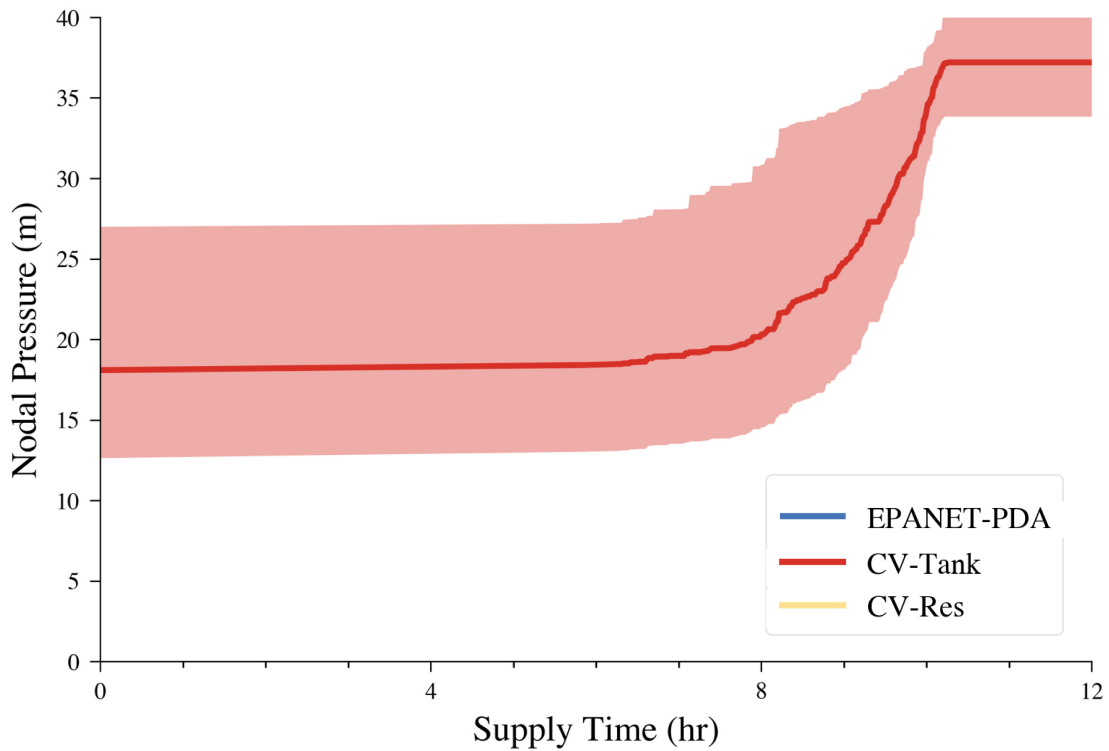

Fig. S6. Mean Nodal Pressure (Solid) and its 10<sup>th</sup> to 90<sup>th</sup> Percentile range (Shaded) for an unrestricted, a volume-restricted and a flow-restricted method in Network 3.

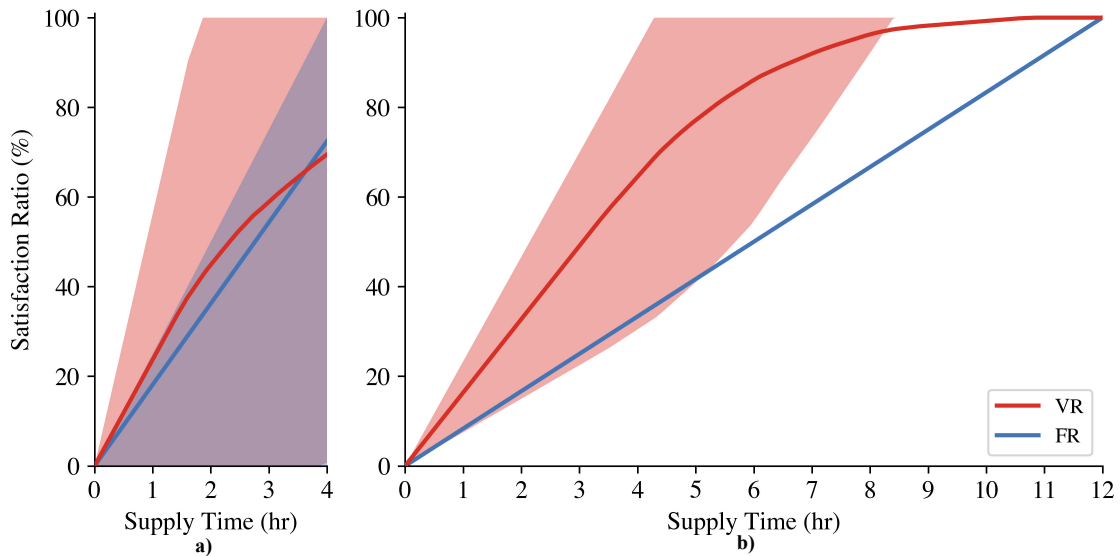

Fig. S7. Mean satisfaction ratio (Solid line) and satisfaction ratio ranging from the 10<sup>th</sup> to 90<sup>th</sup> percentile consumers (shaded) in Network 1 for a Flow-Restricted (FR) and a Volume-Restricted method (VR) over a a) 4-hr supply duration and b) 12-hr supply duration. Corresponding figure: Fig. 3.

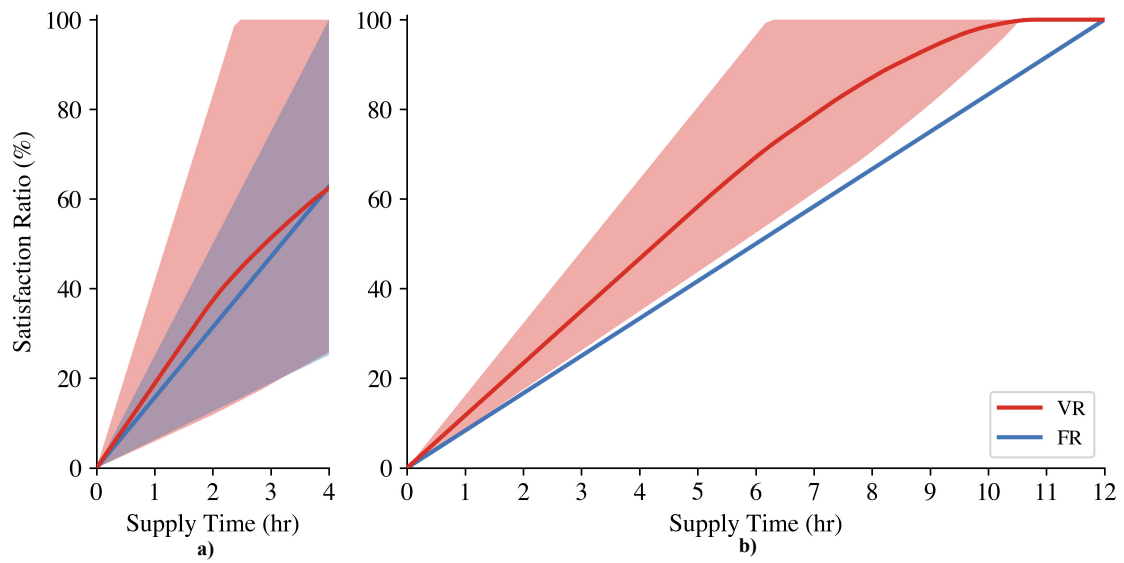

Fig. S8. Mean satisfaction ratio (Solid line) and satisfaction ratio ranging from the 10th to 90th percentile consumers (shaded) in Network 2 for a Flow-Restricted (FR) and a Volume-Restricted method (VR) over a a) 4-hr supply duration and b) 12-hr supply duration. Corresponding figure: Fig. 3.

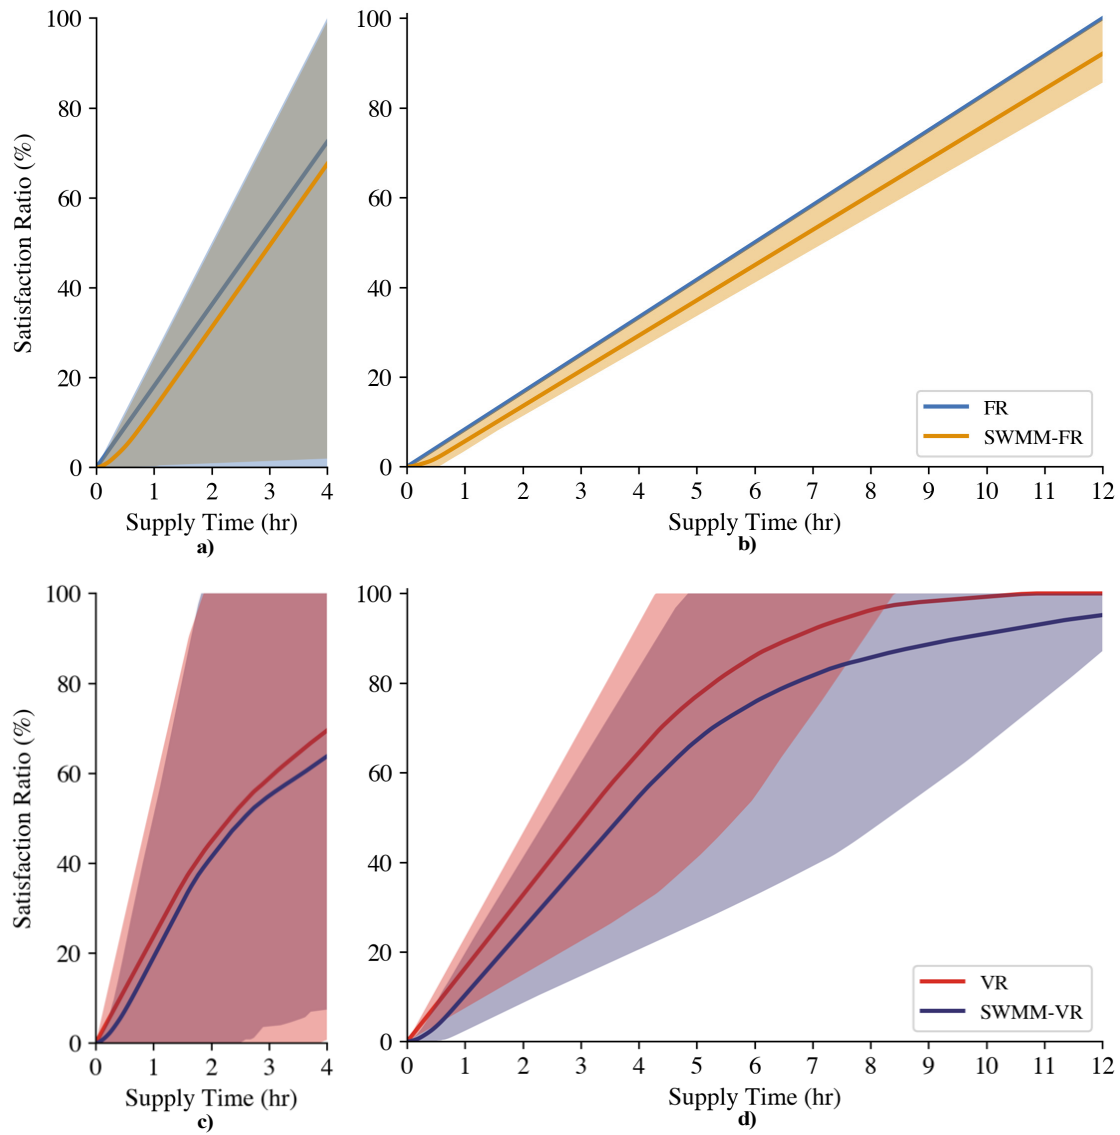

Fig. S9. Predicted mean satisfaction ratio and its range (10<sup>th</sup>-90<sup>th</sup>) in Network 1 with a flow-restricted method ignoring filling (FR) and including filling (SWMM-FR, and a volume-restricted method ignoring filling (VR) and including filling (SWMM-VR) under a 4 hours/day supply (a and c) a 12 hours/day supply (b and d). Corresponding figure: Fig. 4.

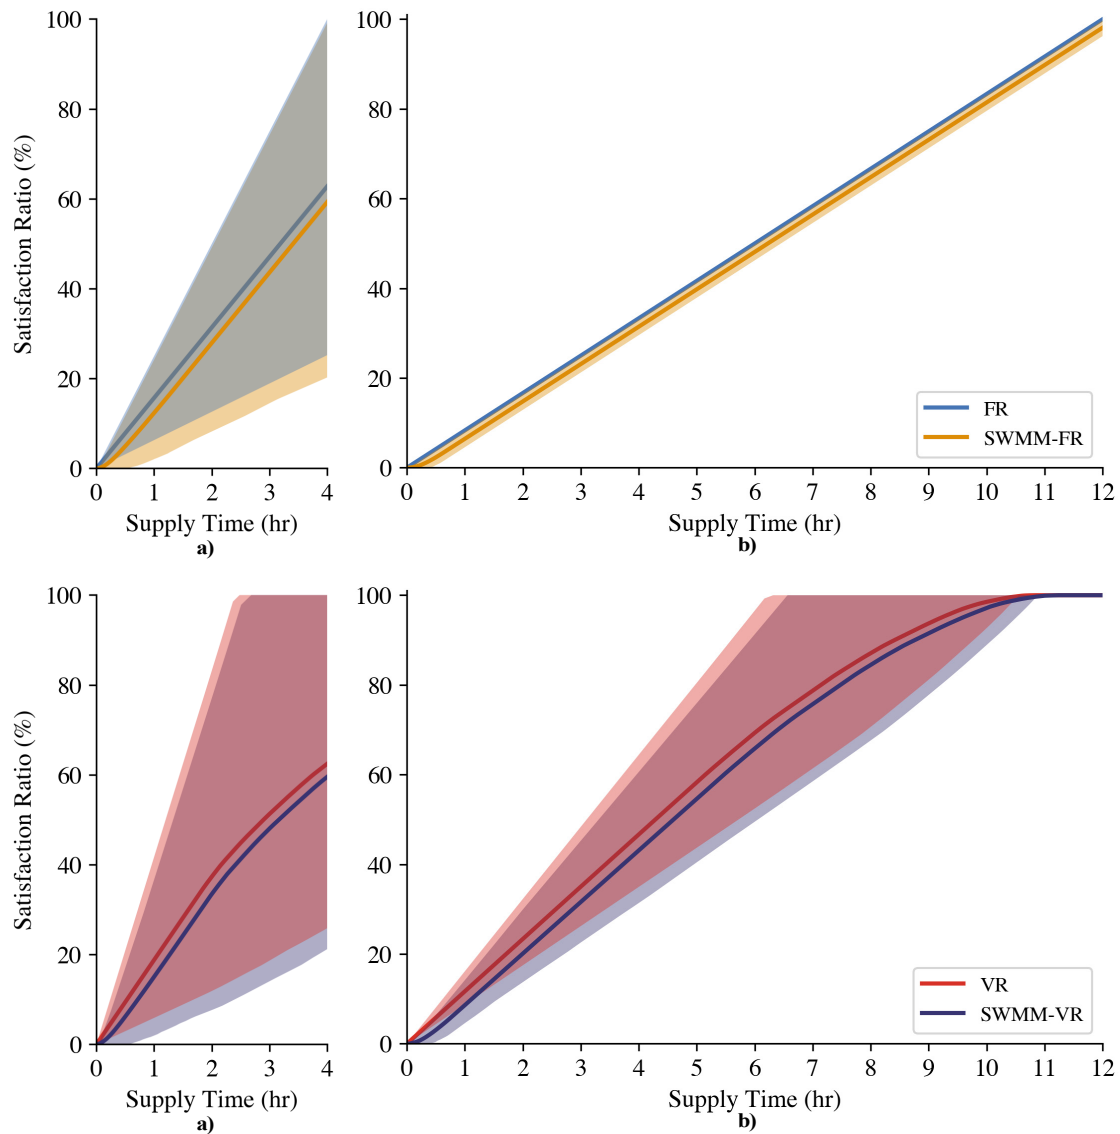

*Fig. S10. Predicted mean satisfaction ratio and its range (10th-90th) in Network 2 with a flow-restricted method ignoring filling (FR) and including filling (SWMM-FR, and a volume-restricted method ignoring filling (VR) and including filling (SWMM-VR) under a 4 hours/day supply (a and c) a 12 hours/day supply (b and d). Corresponding figure: Fig. 4.*



## References

- Abdy Sayyed, M. A. H., R. Gupta, and T. T. Tanyimboh. 2015. "Noniterative Application of EPANET for Pressure Dependent Modelling Of Water Distribution Systems." *Water Resources Management*, 29 (9): 3227–3242. Kluwer Academic Publishers. <https://doi.org/10.1007/s11269-015-0992-0>.
- Ameyaw, E. E., F. A. Memon, and J. Bicik. 2013. "Improving equity in intermittent water supply systems." *Journal of Water Supply: Research and Technology - AQUA*, 62 (8): 552–562. <https://doi.org/10.2166/aqua.2013.065>.
- Ang, W. K., and P. W. Jowitt. 2006. "Solution for Water Distribution Systems under Pressure-Deficient Conditions." *J Water Resour Plan Manag*, 132 (3): 175–182. [https://doi.org/10.1061/\(ASCE\)0733-9496\(2006\)132:3\(175\)](https://doi.org/10.1061/(ASCE)0733-9496(2006)132:3(175)).
- Batish, R. 2003. "A New Approach to the Design of Intermittent Water Supply Networks." *World Water & Environmental Resources Congress 2003*, 1–11. Reston, VA: American Society of Civil Engineers.
- Batterman, A., and S. Macke. 2001. "A Strategy to Reduce Technical Water Losses for Intermittent Water Supply Systems." Suderberg, Germany: Fachhochschule Nordostniedersachsen.
- Bragalli, C., C. D'Ambrosio, J. Lee, A. Lodi, and P. Toth. 2012. "On the optimal design of water distribution networks: a practical MINLP approach." *Optimization and Engineering*, 13 (2): 219–246. <https://doi.org/10.1007/s11081-011-9141-7>.
- Cabrera-Bejar, J. A., and V. G. Tzatchkov. 2009. "Inexpensive Modeling of Intermittent Service Water Distribution Networks." *World Environmental and Water Resources Congress 2009*, 1–10. Reston, VA: American Society of Civil Engineers.
- Campisano, A., A. Gullotta, and C. Modica. 2019a. "Modelling private tanks in intermittent water distribution systems by use of EPA-SWMM." *17th International Computing & Control for the Water Industry Conference*. Exeter, UK: University of Exeter.
- Campisano, A., A. Gullotta, and C. Modica. 2019b. "Using EPA-SWMM to simulate intermittent water distribution systems." *Urban Water J*, 15 (10): 925–933. Taylor and Francis Ltd. <https://doi.org/10.1080/1573062X.2019.1597379>.
- Dubasik, F. 2017. "Planning for Intermittent Water Supply in Small Gravity-Fed Distribution Systems: Case Study in Rural Panama." Master's Thesis. Michigan Technological University .
- Fontanazza, C. M., G. Freni, and G. La Loggia. 2007. "Analysis of intermittent supply systems in water scarcity conditions and evaluation of the resource distribution equity indices." *WIT Transactions on Ecology and the Environment*, 103: 635–644. WITPress. <https://doi.org/10.2495/WRM070591>.
- Gorev, N. B., and I. F. Kodzhespirova. 2013. "Noniterative Implementation of Pressure-Dependent Demands Using the Hydraulic Analysis Engine of EPANET 2." *Water Resources Management*, 27 (10): 3623–3630. <https://doi.org/10.1007/s11269-013-0369-1>.
- Gullotta, A., D. Butler, A. Campisano, E. Creaco, R. Farmani, and C. Modica. 2021. "Optimal Location of Valves to Improve Equity in Intermittent Water Distribution Systems." *J Water Resour Plan Manag*, 147 (5). American Society of Civil Engineers (ASCE). [https://doi.org/10.1061/\(asce\)wr.1943-5452.0001370](https://doi.org/10.1061/(asce)wr.1943-5452.0001370).
- Ingeduld, P., A. Pradhan, Z. Svitak, and A. Terrai. 2006. "Modelling Intermittent Water Supply Systems with EPANET." *8th Annual Water Distribution Systems Analysis Symposium*.

- Jinesh Babu, K. S., and S. Mohan. 2012. "Extended Period Simulation for Pressure-Deficient Water Distribution Network." *Journal of Computing in Civil Engineering*, 26 (4): 498–505. American Society of Civil Engineers (ASCE).  
[https://doi.org/10.1061/\(asce\)cp.1943-5487.0000160](https://doi.org/10.1061/(asce)cp.1943-5487.0000160).
- Kabaasha, A. 2012. "Modelling Unsteady Flow Regimes under Varying Operating Conditions in Water Distribution Networks." MSc Thesis. Delft, The Netherlands: UNESCO-IHE Institute for Water Education.
- Lieb, A. M., C. H. Rycroft, and J. Wilkening. 2016. "Optimizing Intermittent Water Supply in Urban Pipe Distribution Networks." *SIAM J Appl Math*, 76 (4): 1492–1514.  
<https://doi.org/10.1137/15M1038979>.
- Mahmoud, H. A., D. Savić, and Z. Kapelan. 2017. "New Pressure-Driven Approach for Modeling Water Distribution Networks." *J Water Resour Plan Manag*, 143 (8): 04017031. American Society of Civil Engineers (ASCE).  
[https://doi.org/10.1061/\(asce\)wr.1943-5452.0000781](https://doi.org/10.1061/(asce)wr.1943-5452.0000781).
- De Marchis, M., C. M. Fontanazza, G. Freni, G. La Loggia, E. Napoli, and V. Notaro. 2010. "A model of the filling process of an intermittent distribution network." *Urban Water J*, 7 (6): 321–333. Taylor and Francis Ltd. <https://doi.org/10.1080/1573062X.2010.519776>.
- Mohan, S., and G. R. Abhijith. 2020. "Hydraulic Analysis of Intermittent Water-Distribution Networks Considering Partial-Flow Regimes." *J Water Resour Plan Manag*, 146 (8): 04020071. American Society of Civil Engineers (ASCE).  
[https://doi.org/10.1061/\(asce\)wr.1943-5452.0001246](https://doi.org/10.1061/(asce)wr.1943-5452.0001246).
- Mohapatra, S., A. Sargaonkar, and P. K. Labhasetwar. 2014. "Distribution Network Assessment using EPANET for Intermittent and Continuous Water Supply." *Water Resources Management*, 28 (11): 3745–3759. <https://doi.org/10.1007/s11269-014-0707-y>.
- Neelakantan, T. R., and K. Rohini. 2021. "Simplified Pressure-Driven Analysis of Water Distribution Network and Resilience Estimation." *J Water Resour Plan Manag*, 147 (3). [https://doi.org/10.1061/\(ASCE\)WR.1943-5452.0001349](https://doi.org/10.1061/(ASCE)WR.1943-5452.0001349).
- Paez, D., C. R. Suribabu, and Y. Filion. 2018. "Method for Extended Period Simulation of Water Distribution Networks with Pressure Driven Demands." *Water Resources Management*, 32 (8): 2837–2846. Springer Netherlands.  
<https://doi.org/10.1007/s11269-018-1961-1>.
- Segura, J. L. A. 2006. "Use of hydroinformatics technologies for real time water quality management and operation of distribution networks. Case study of Villavicencio, Colombia." MSc. UNESCO-IHE Institute for Water Education.
- Shrestha, M., and S. G. Buchberger. 2012. "Role of Satellite Water Tanks in Intermittent Water Supply System." *World Environmental and Water Resources Congress 2012*, 944–951. Reston, VA: American Society of Civil Engineers.
- Siew, C., and T. T. Tanyimboh. 2012. "Pressure-Dependent EPANET Extension." *Water Resources Management*, 26 (6): 1477–1498. <https://doi.org/10.1007/s11269-011-9968-x>.
- Sivakumar, P., N. B. Gorev, T. T. Tanyimboh, I. F. Kodzhespirova, C. R. Suribabu, and T. R. Neelakantan. 2020. "Dynamic Pressure-Dependent Simulation of Water Distribution Networks Considering Volume-Driven Demands Based on Noniterative Application of EPANET 2." *J Water Resour Plan Manag*, 146 (6): 06020005.  
[https://doi.org/10.1061/\(ASCE\)WR.1943-5452.0001220](https://doi.org/10.1061/(ASCE)WR.1943-5452.0001220).

- Sivakumar, P., and R. K. Prasad. 2014. "Simulation of Water Distribution Network under Pressure-Deficient Condition." *Water Resources Management*, 28 (10): 3271–3290. Kluwer Academic Publishers. <https://doi.org/10.1007/s11269-014-0677-0>.
- Sivakumar, P., and R. K. Prasad. 2015. "Extended Period Simulation of Pressure-Deficient Networks Using Pressure Reducing Valves." *Water Resources Management*, 29 (5): 1713–1730. Kluwer Academic Publishers. <https://doi.org/10.1007/s11269-014-0907-5>.
- Suribabu, C. R., P. Sivakumar, and N. Sivakumar. 2022. "Volume driven analysis for house level water supply assessment in an intermittent water supply system." *ISH Journal of Hydraulic Engineering*. Taylor and Francis Ltd. <https://doi.org/10.1080/09715010.2022.2098683>.
- Taylor, D. D. J., A. H. Slocum, and A. J. Whittle. 2019. "Demand Satisfaction as a Framework for Understanding Intermittent Water Supply Systems." *Water Resour Res*, 55 (7): 5217–5237. Blackwell Publishing Ltd. <https://doi.org/10.1029/2018WR024124>.
